# Supplementary material for: Antioxidant and Anti-inflammatory Extracts From Sea Cucumbers and Tunicates Induce a Pro-osteogenic Effect in Zebrafish Larvae
Source: PubMed Central journal article supplement (PMC9125325; doi:10.3389/fnut.2022.888360), 2022-05-09
Supplement: Data_Sheet_1.pdf [file Data_Sheet_1.pdf]

## SUPPLEMENTARY MATERIAL

**Supplementary Table I.** GenBank accession numbers for the sequence data obtained for the identification of four species of Tunicates.

| Species                              | BOLDSystems Process ID | GenBank accession number |
|--------------------------------------|------------------------|--------------------------|
| Aplidium sp.                         | SCUTU005-22            | ON059139                 |
| Aplidium sp.                         | SCUTU006-22            | ON059140                 |
| Botrylloides diegensis               | SCUTU008-22            | ON059141                 |
| Ciona robusta                        | SCUTU010-22            | ON059142                 |
| Ciona robusta                        | SCUTU009-22            | ON059143                 |
| Holothuria (Roweothuria) arguinensis | SCUTU001-22            | ON059144                 |
| Holothuria (Panningothuria) forskali | SCUTU002-22            | ON059145                 |
| Holothuria (Holothuria) mammata      | SCUTU004-22            | ON059146                 |
| Holothuria (Holothuria) mammata      | SCUTU003-22            | ON059147                 |
| Styela plicata                       | SCUTU007-22            | ON059148                 |

## SUPPLEMENTARY FIGURE LEGENDS

**Supplementary Figure 1.** Effect of the treatment with different extracts on the area of the head of zebrafish larvae for holothurians hydroethanolic (**A**) and aqueous extracts (**B**) and for tunicates hydroethanolic (**C**) and aqueous extracts (**D**) respectively. Statistical differences among the means were tested through One-way ANOVA followed by Dunnett's multiple comparison test ( $p < 0.05$ ) or, whenever normality and homoscedasticity weren't met, through a non-parametric test followed by Dunn's multiple comparison test ( $p < 0.05$ ). HE - hydroethanolic extracts, AQ – aqueous extracts, 100 – 100  $\mu\text{g/mL}$ , 200 – 200  $\mu\text{g/mL}$ .
